# Supplementary material for: Enhanced Photodetectivity and responsivity of Bi-S films for visible light photodetectors: an experimental and density functional theory study
Source: Royal Society of Chemistry journal article supplement (doi:10.1039/d6ra01732k), 2026-04-27
Supplement: d6ra01732k1.pdf [file d6ra01732k1.pdf]

## Supporting Information

### **Enhanced Photodetectivity, Responsivity of Bi-S Films for Visible Light Photodetector: An Experimental and Density Functional Study**

L. Mahapatra<sup>1</sup>, D. Kar<sup>1,2</sup>, B. Mohanty<sup>2</sup>, Prabhukrupa C. Kumar<sup>2</sup>,

D. Alagarasan<sup>3</sup>, C. Sripan<sup>4</sup>, R. Swain<sup>5</sup>, J. Kumar<sup>5,6</sup>, S. Brahma<sup>7</sup>, R. Naik<sup>\*2</sup>

<sup>1</sup>*Department of Physics, Nayagarh Autonomous College, Nayagarh, 752069, India*

<sup>2</sup>*Department of Engineering and Material Physics, ICT-IOC, Bhubaneswar, 751013, India*

<sup>3</sup>*Department of Physics, Nitte Meenakshi Institute of Technology (NMIT), Nitte (Deemed to be University), Bengaluru, 560064, India*

<sup>4</sup>*Department of Physics, Dayananda Sagar Academy of Technology and Management, Udayapura, Bangalore, 560082, India*

<sup>5</sup>*Department of Physics, Utkal University, Bhubaneswar 751004, India*

<sup>6</sup>*Department of Physics and Astrophysics, University of Delhi, Delhi-110007, India*

<sup>7</sup>*Department of Physics, Madanapalle Institute of Technology and Science, Deemed to be University, Madanapalle, Andhra Pradesh, 517325*

*\*Corresponding author: ramakanta.naik@gmail.com*

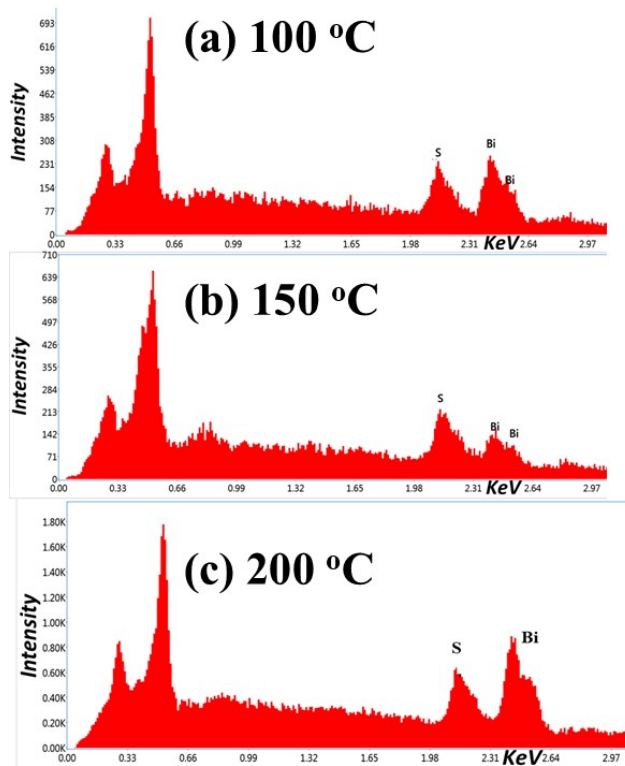

Fig. S1. EDX spectra for (a)100 °C (b)150 °C, (c)200 °C annealed thin films.

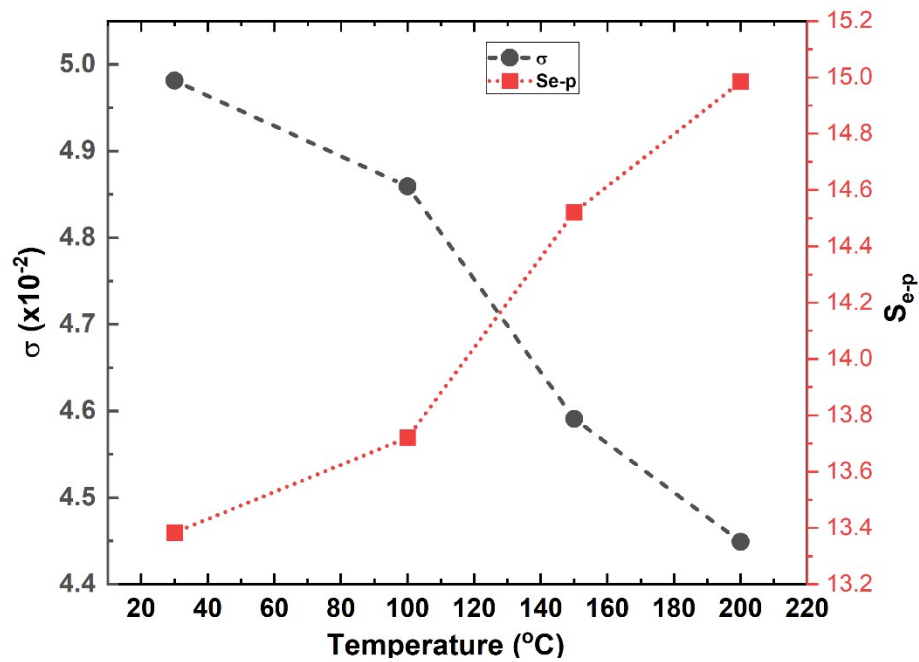

Fig. S2. Variation of the steepness parameter and the electron-phonon strength with annealing temperature.

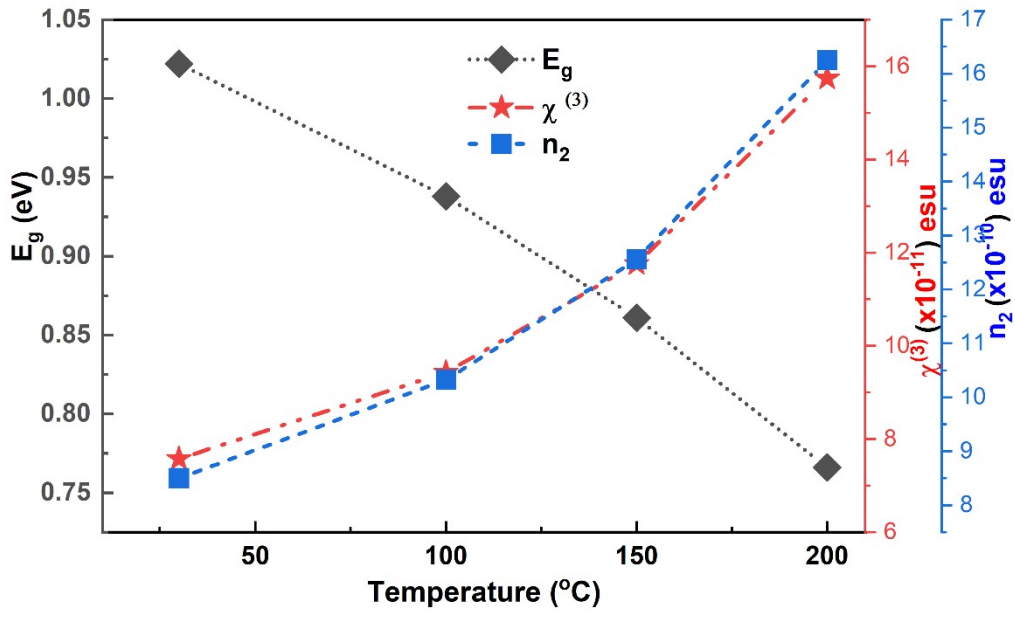

**Fig. S3.** Variation of  $E_g$ ,  $\chi^{(3)}$  and  $n_2$  at different annealing temperatures.

**Table S1.** Comparison of  $\chi^3$  values with other for  $\text{Bi}_2\text{S}_3$  or similar chalcogenides.

| Sample name                                                             | $\chi^3$ (esu)                   | Reference |
|-------------------------------------------------------------------------|----------------------------------|-----------|
| $\text{Bi}_2\text{S}_3$                                                 | $2.699 - 2.701 \times 10^{-10}$  | 1         |
| $\text{Bi}_2\text{S}_{2.75}\text{Se}_{0.25}$                            | $4.797 - 6.512 \times 10^{-10}$  | 1         |
| $\text{Bi}_2\text{S}_3$                                                 | $6.25 \times 10^{-11}$           | 2         |
| $\text{Bi}_2\text{S}_3$ nanocrystals doped in sodium borosilicate glass | $1.43 \times 10^{-10}$           | 3         |
| $\text{Bi}_2\text{S}_3$                                                 | $7.574 - 15.744 \times 10^{-11}$ | This Work |

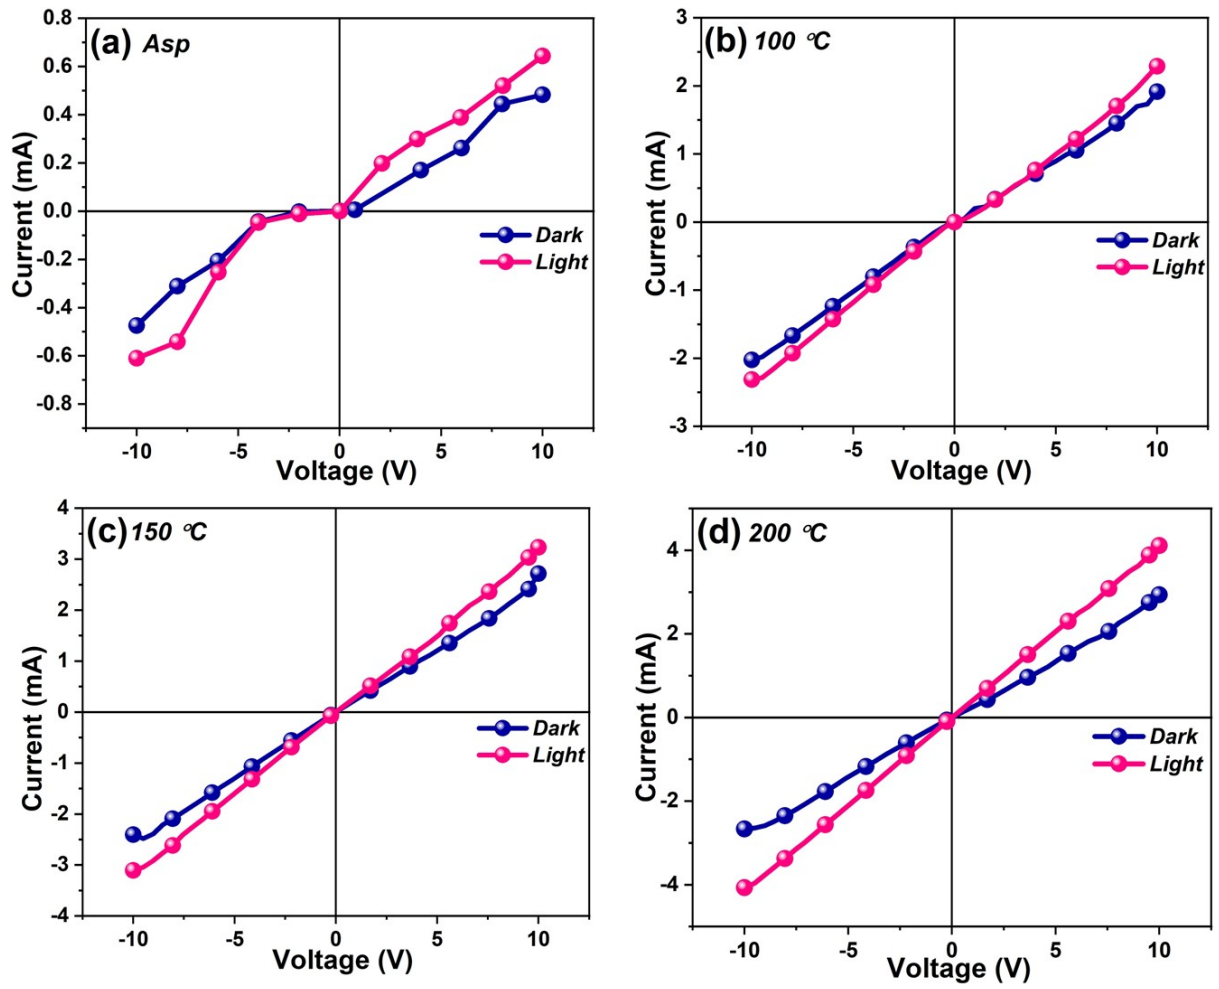

**Fig. S4.** I-V characteristics plot of individual samples (a) Asp, (b) 100 °C, (c) 150 °C, and (d) 200 °C of  $\text{Bi}_2\text{S}_3$  thin films.

**Reference:**

1. Ben Abdallah, H., Ouerghui, W. Spin-orbit coupling effect on electronic, linear and nonlinear optical properties of  $\text{Bi}_2\text{S}_3$  and the ternary bismuth sulfide  $\text{Bi}_2\text{S}_{2.75}\text{Se}_{0.25}$ : Ab-initio calculations. *Opt. Quant Electron*, 2022, **54**, 20.
2. C. Li, G. Shi, Y. Song, X. Zhang, S. Guang, H. Xu, Third-order nonlinear optical properties of  $\text{Bi}_2\text{S}_3$  and  $\text{Sb}_2\text{S}_3$  nanorods studied by the Z-scan technique. *J. Phys. Chem. Solids*, 2008, **69**, 1829-1834.
3. X. Yang, W. Xiang, H. Zhao, X. Zhang, X. Liang, S. Dai, F. Chen, Third-order nonlinear optical properties of  $\text{Bi}_2\text{S}_3$  nanocrystals doped in sodium borosilicate glass studied with Z-scan technique. *Mater. Res. Bull.*, 2011, **46**, 355-360.
